# Supplementary material for: Hematopoietic Cell Transplantation for Inborn Errors of Immunity Other Than Severe Combined Immunodeficiency in Japan: Retrospective Analysis for 1985–2016
Source: Research Square preprint supplement (doi:10.21203/rs.3.rs-516749/v1), 2021-05-27

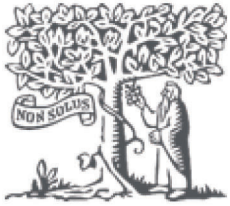

ELSEVIER

# Certificate of Elsevier Language Editing Services

**The following article was edited by Elsevier Language Editing Services:**

**"Hematopoietic cell transplantation for inborn errors of immunity in Japan:  
retrospective analysis for non-severe combined immunodeficiency in 1985–2016"**

**Authored by:  
Satoshi Miyamoto**

Date: 20-Apr-2021

Serial number: LE-210296-EB011E32A4E7

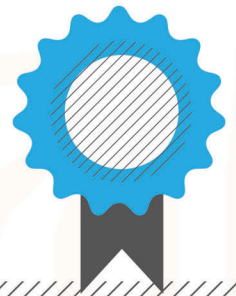

Supplement: Supplementary file 1 [file 717ea2944030f4eaacaa5296.pdf]
